# Supplementary material for: Association between discontinuation of anamorelin and immunotrophic index in patients with cancer-associated cachexia: a single-center retrospective study
Source: Research Square preprint supplement (doi:10.21203/rs.3.rs-6108504/v1), 2025-03-05

**Supportive Care in Cancer**

**Types of Papers:** Research

**Association between discontinuation of anamorelin and immunotrophic index in patients with cancer-associated cachexia: a single-center retrospective study**

Aiko Fukui<sup>1\*</sup>, Ryosuke Ota<sup>1</sup>, Atsushi Hirata<sup>1</sup>

<sup>1</sup>Department of Pharmacy, Kindai University Nara Hospital, Ikoma, Japan

**\*Corresponding author:** Aiko Fukui

Department of Pharmacy, Kindai University Nara Hospital

1248-1, Otoda-cho, Ikoma, Nara, 630-0293, Japan

Telephone number: +81-743-77-0880

Fax number: +81-743-77-0906

Email address: [a-fukui@med.kindai.ac.jp](mailto:a-fukui@med.kindai.ac.jp)

ORCID: 0009-0001-3484-7782

**Author information:**

1. Ryosuke Ota

Department: Department of Pharmacy

Institution: Kindai University Nara Hospital

City and country: Ikoma, Japan

Email address: [oota-ryosuke@med.kindai.ac.jp](mailto:oota-ryosuke@med.kindai.ac.jp)

[ORCID: 0000-0003-0161-6766](https://orcid.org/0000-0003-0161-6766)

2. Atsushi Hirata

Department: Department of Pharmacy

Institution: Kindai University Nara Hospital

City and country: Ikoma, Japan

Email address: [hirata1976@med.kindai.ac.jp](mailto:hirata1976@med.kindai.ac.jp)

[ORCID: 0000-0002-4865-3807](https://orcid.org/0000-0002-4865-3807)

## Online Resource 1

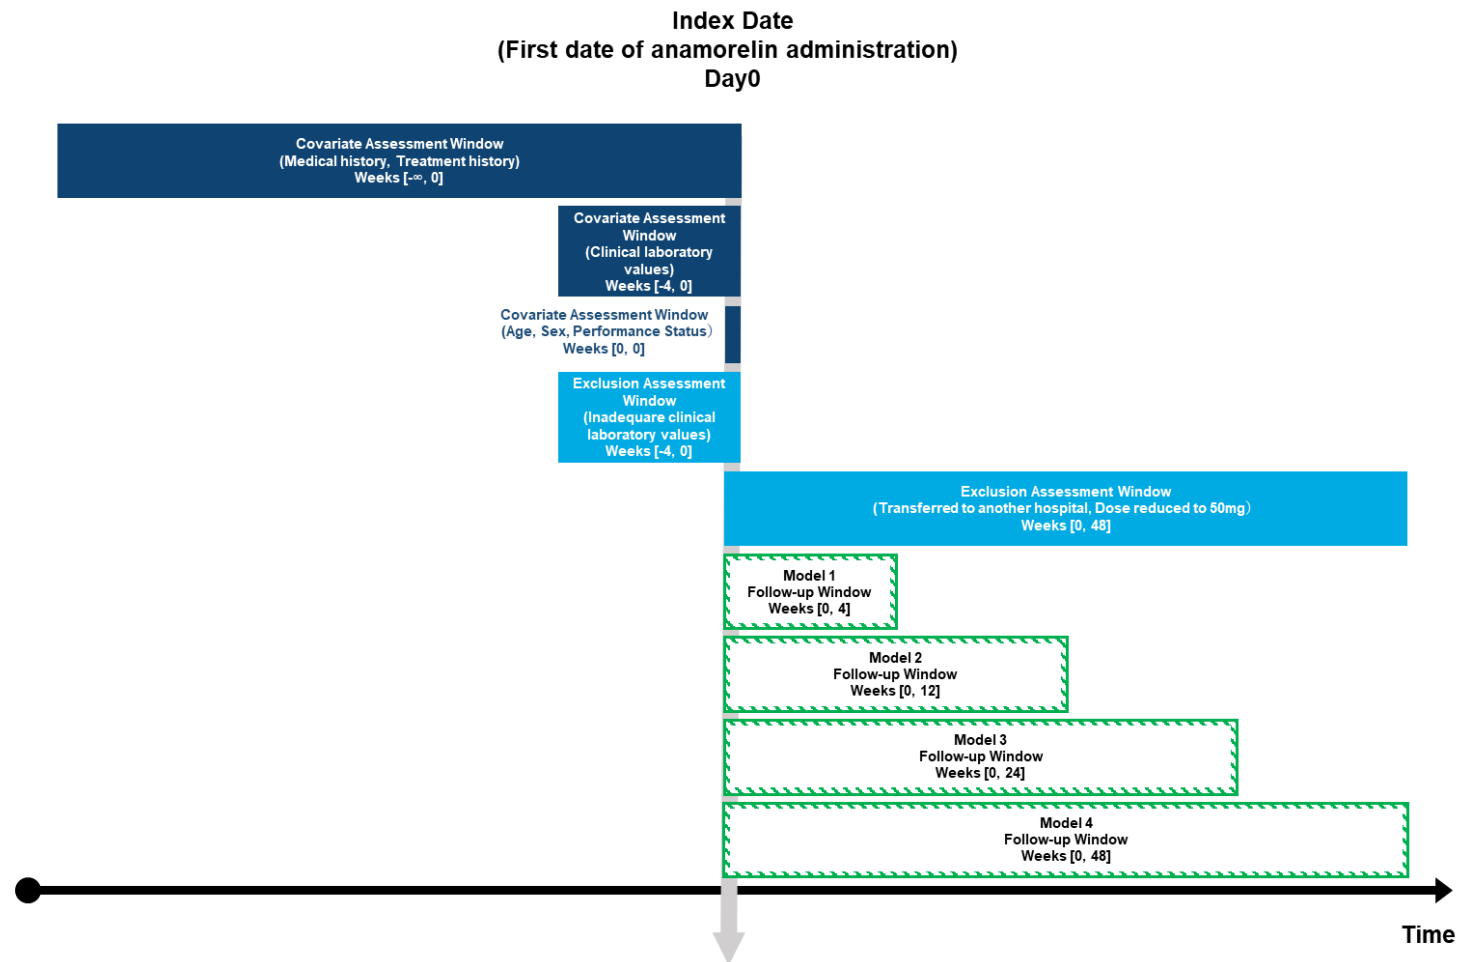

Supplement: Supplementary file 1 [file ceef4100aaba4c1dc3594921.pdf]
