# Supplementary material for: Association between discontinuation of anamorelin and immunotrophic index in patients with cancer-associated cachexia: a single-center retrospective study
Source: Research Square preprint supplement (doi:10.21203/rs.3.rs-6108504/v1), 2025-03-05
Supplement: Supplementary file 1 [file e16cef1a4a9cc5562aefb784.xlsx]

## Sheet: Online Resource 2
Supportive Care in Cancer
Types of Papers: Research
Association between discontinuation of anamorelin and immunotrophic index in patients with cancer-associated cachexia: a single-center retrospective study
Aiko Fukui1*, Ryosuke Ota1, Atsushi Hirata1
1Department of Pharmacy, Kindai University Nara Hospital, Ikoma, Japan
*Corresponding author: Aiko Fukui
Department of Pharmacy, Kindai University Nara Hospital
1248-1, Otoda-cho, Ikoma, Nara, 630-0293, Japan
Telephone number: +81-743-77-0880
Fax number: +81-743-77-0906
Email address: a-fukui@med.kindai.ac.jp
ORCID: 0009-0001-3484-7782
Author information:
1. Ryosuke Ota
Department: Department of Pharmacy
Institution: Kindai University Nara Hospital
City and country: Ikoma, Japan
Email address: oota-ryousuke@med.kindai.ac.jp
ORCID: 0000-0003-0161-6766
2. Atsushi Hirata
Department: Department of Pharmacy
Institution: Kindai University Nara Hospital
City and country: Ikoma, Japan
Email address: hirata1976@med.kindai.ac.jp
ORCID: 0000-0002-4865-3807
Online Resource 2 Reasons for discontinuation of anamorelin
		≤ 4 w (n = 31)	≤ 12 w (n = 53)	≤ 24 w (n = 71)	≤ 48 w (n = 83)
Exacerbation of primary disease	n (%)	9 (29.0)	20 (37.7)	26 (36.6)	31 (37.3)
Ineffectiveness	n (%)	7 (22.6)	7 (13.2)	7 (9.9)	7(8.4)
Died	n (%)	5 (16.1)	7 (13.2)	8 (11.3)	8 (9.6)
Improved appetite	n (%)	0 (0)	4 (7.5)	12 (16.9)	14 (16.9)
End of treatment	n (%)	0 (0)	1 (1.9)	2 (2.8)	3 (3.6)
Adverse events
Hepatic disorder	n (%)	2 (6.5)	3 (5.7)	3 (4.2)	3 (3.6)
Cardiac conduction disturbances	n (%)	2 (6.5)	2 (3.8)	2 (2.8)	2 (2.4)
Hyperglycemia	n (%)	1 (3.2)	2 (3.8)	2 (2.8)	3 (3.6)
Fatigue	n (%)	1 (3.2)	1 (1.9)	1 (1.4)	1 (1.2)
Nausea	n (%)	1 (3.2)	1 (1.9)	1 (1.4)	1 (1.2)
Infection	n (%)	1 (3.2)	1 (1.9)	1 (1.4)	1 (1.2)
Others	n (%)	2 (6.5)	4 (7.5)	6 (8.5)	9 (10.8)
